# Supplementary material
Source: PubMed Central journal article supplement (PMC3012523)
Supplement: 1012046108_pnas.201012046SI.pdf [file 1012046108_pnas.201012046SI.pdf]

# Supporting Information

Pronin and Kugler 10.1073/pnas.1012046108

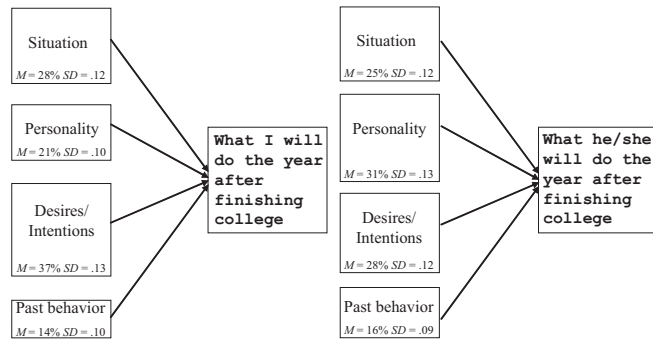

**Fig. S1.** Average graph drawn by participants modeling their own (*Left*) and their roommate's (*Right*) behavior upon finishing college. Differences in box size indicate average differences across participants. Mean and SD indicate, consistent with box size, percentage of total area assigned to each predictor (experiment 4).

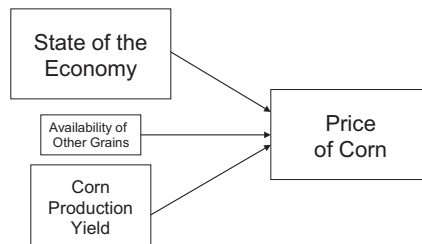

**Fig. S2.** Instructional model presented to participants (experiment 4). The model was preceded by the following verbatim description: A model for predicting the price of corn next season might include three factors: (1) the state of the economy (e.g., is there a recession?), (2) the availability of other grains (e.g., is this a good season for wheat?), and (3) the yield of corn production that season (e.g., did a good deal of corn grow this season, or not much?). Let's imagine that our model assumes that the economy is the most important factor, that the yield of corn production is a close second, and that the availability of other grains is a distant third. In that case, the model could look something like this.
